# Supplementary material for: Fluorescence sensor using porous host molecules deposited on filter paper with vapochromic and mechanochromic properties
Source: Royal Society of Chemistry journal article supplement (doi:10.1039/d2nj04929e), 2023-01-01
Supplement: d2nj04929e1.pdf [file d2nj04929e1.pdf]

## Electronic Supplementary Information

### **Fluorescence sensor using porous host molecules deposited on filter paper with vapochromic and mechanochromic properties**

Sota Umezane, Satoshi Fukutomi, Toshikazu Ono,\* Yoshio Hisaeda,  
Tomoki Nishimura, Riku Kawasaki and Atsushi Ikeda \*

## Experimental Procedures

### Materials

Compounds **1** and **2** were synthesized using methods described in previous papers.<sup>12,27</sup>

### Preparation of 1- and 2-adsorbed papers

Chloroform solutions of **1** (0.5 mM, 10  $\mu$ L) and **2** (2.5 mM, 10  $\mu$ L) were dropped on the paper filters (21 mm in diameter; Kiriya Glass Works Co., Tokyo, Japan) and dried at ambient temperature.

### Preparation of 1- and 2-adsorbed papers exposed to vapors of small aromatic guests

The 1- and 2-adsorbed papers and small Petri dish (30-mm diameter) with small aromatic guests were placed in a glass Petri dish (90-mm diameter) with a lid.

### UV-vis diffuse reflectance and fluorescence emission measurements

UV-vis diffuse reflectance measurements were recorded using a JASCO V-670 spectrometer (JASCO Corp., Tokyo, Japan) with an integrating sphere attachment. Fluorescence excitation and emission spectra were collected at 25 °C on a Hitachi F-7000 fluorescence spectrometer (Hitachi Ltd., Tokyo, Japan). Emission spectra were collected between 385 and 800 nm, with a scan speed of 240 nm/min, and the slits were set at 5.0 nm (excitation slit) and 5.0 nm (emission slit). The excitation wavelength was 370 nm.

### Wide-angle X-ray scattering (WAXS)

WAXS measurements were performed at BL40B2 of SPring-8, Japan. A  $7.73 \times 3.86$  cm<sup>2</sup> photon-counting detector (EIGER 2 S) was placed 0.098 m away from the sample. The wavelength ( $\lambda$ ) of the incident beam was 1 Å. These setups provided a  $q$  range of 2–30 nm<sup>-1</sup>, where  $q$  is the magnitude of the scattering vector defined by  $q = 4\pi\sin\theta/\lambda$  with a scattering angle of  $2\theta$ . WAXS spectra were measured at 25 °C, with an exposure time of 180 s. The resulting 2D WAXS images were converted to 1D  $I(q)$  versus  $q$  profiles by circular averaging with the software package FIT2D.

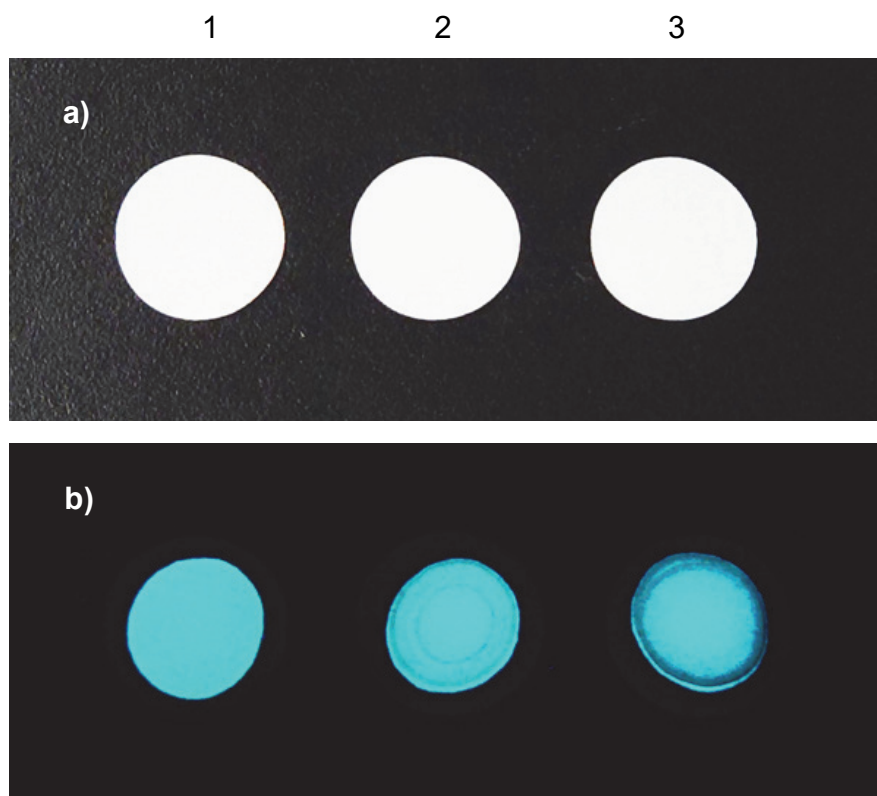

**Fig. S1** Photographs of a paper filter under a) daylight and b) a UV lamp (365 nm). The **2**-adsorbed papers were prepared by one cycle (Sample 1), two cycles (Sample 2), and three cycles (Sample 3) of dropping the chloroform solution of **2** (10  $\mu$ L, [**2**] = 2.5 mM) and drying. The paper filters were exposed to toluene vapor for 1 h (paper filters' diameter: 21 mm).

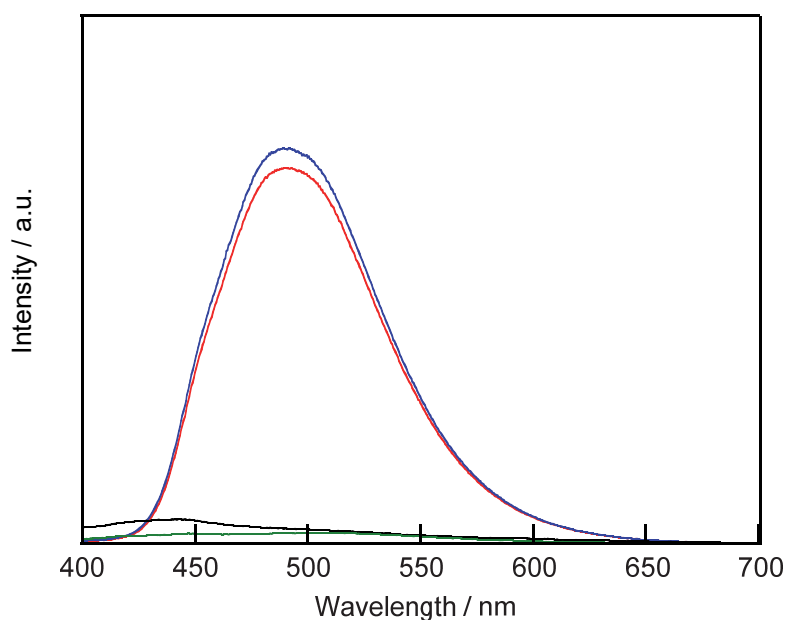

**Fig. S2** Emission spectra of a filter paper without the adsorption of **2** (black), the **2**-adsorbed papers (dropping of the chloroform solution **2** and drying; 10  $\mu$ L, [**2**] = 2.5 mM) after the exposure of chloroform vapor (green), toluene vapor (blue) and toluene-hexane vapor (red) for 1 h. Excitation at 370 nm.

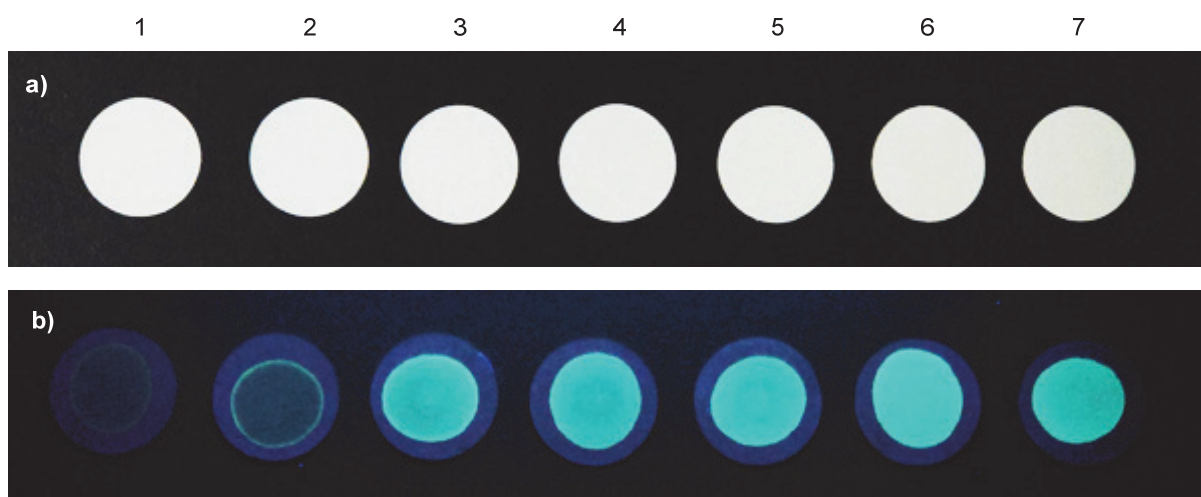

**Fig. S3** Photographs of a paper filter under a) daylight and b) a UV lamp (365 nm). Samples 1–7 of the **2**-adsorbed papers (dropping of the chloroform solution **2** and drying; 10  $\mu\text{L}$ , [**2**] = 2.5 mM) were exposed to toluene vapor for 0, 10, 20, 30, 40, 60, and 120 min, respectively (paper filters' diameter: 21 mm).

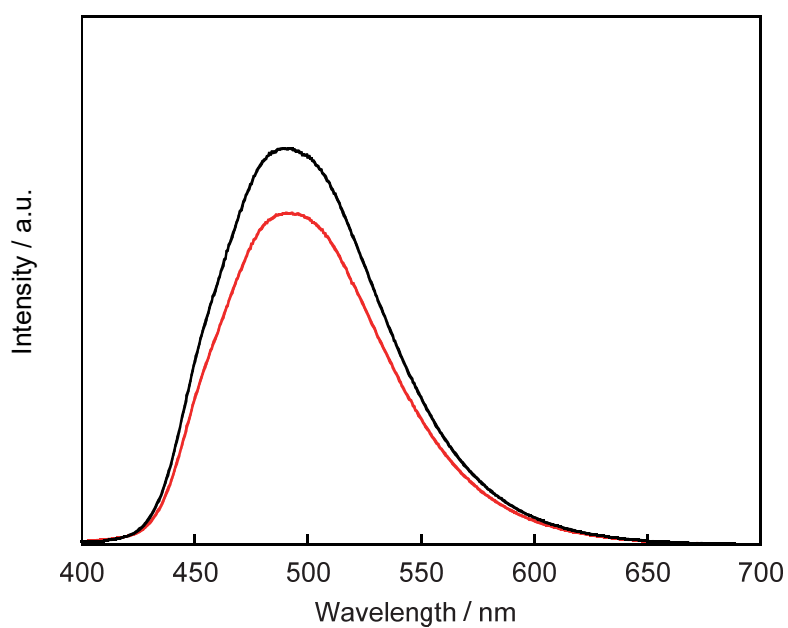

**Fig. S4** Emission spectra of the **2**-dropped papers (dropping of the chloroform solution **2** and drying; 10  $\mu\text{L}$ , [**2**] = 2.5 mM) prepared for one week ago (red) and prepared immediately before use (black) after the exposure of toluene vapor for 1 h. Excitation at 370 nm.

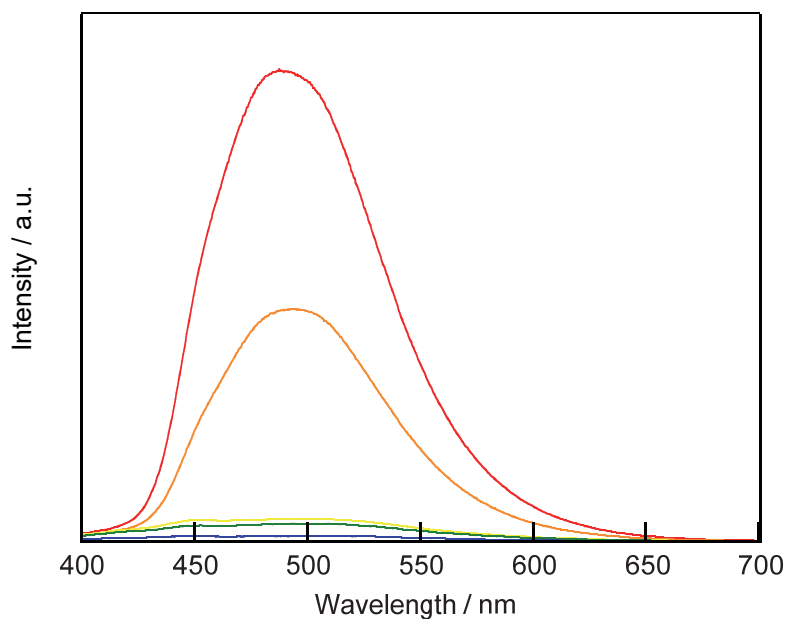

**Fig. S5** Emission spectra of the **2**-adsorbed papers (dropping of the chloroform solution **2** and drying; 10  $\mu$ L, [**2**] = 2.5 mM) before (blue) and after 24 h of exposure to toluene vapor of 20 (green), 50 (yellow), 100 (orange), and 200 (red) ppm. Excitation at 370 nm.

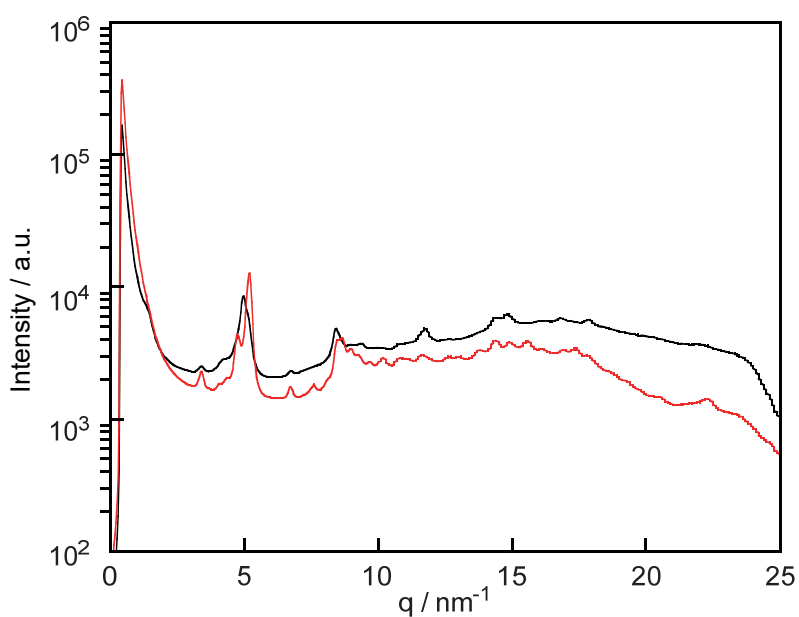

**Fig. S6** 1D WAXS intensity profiles of **2** dried from chloroform solutions before (black) and after (red) complexes upon exposure to toluene vapor.

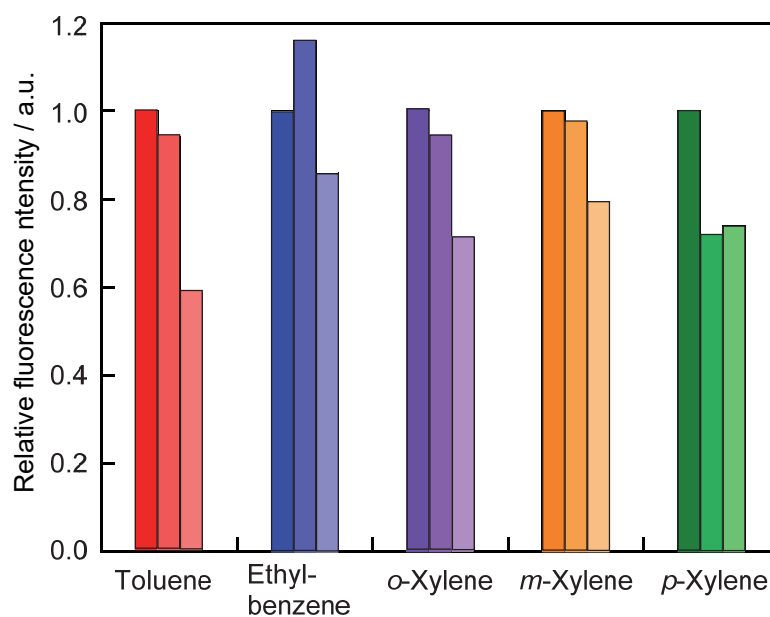

**Fig. S7** Relative fluorescence intensity of the **2**-toluene-adsorbed (red), **2**-ethylbenzene-adsorbed (blue), **2**-*o*-xylene-adsorbed (purple), **2**-*m*-xylene-adsorbed (red), and **2**-*p*-xylene-adsorbed (green) papers after incubation for 0 (left), 15 (center), and 30 (right) days (dropping of the chloroform solution **2** and drying; 10  $\mu$ L, [**2**] = 2.5 mM). Excitation at 370 nm.

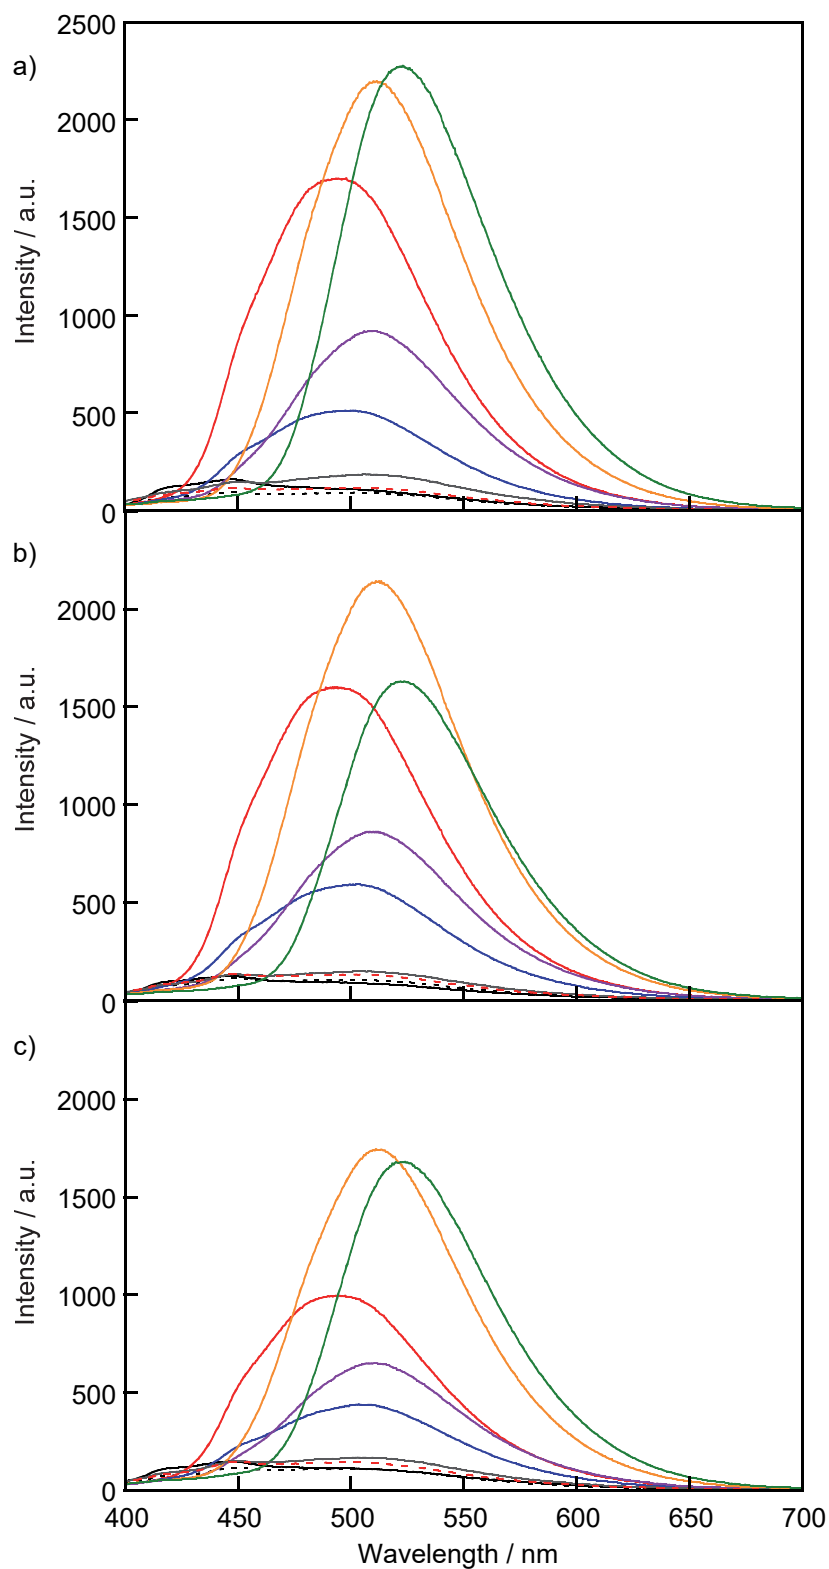

**Fig. S8** Emission spectra of **2** dropped on paper filters (dropping of the chloroform solution **2** and drying; 10  $\mu$ L, [**2**] = 2.5 mM) before (black dashed line) and after exposure to vapors of benzene (black), toluene (red), ethylbenzene (blue), *o*-xylene (purple), *m*-xylene (orange), *p*-xylene (green), 1,3,5-trimethylbenzene (gray), and hexane (red dashed line) after incubation for (a) 0, (b) 15, and (c) 30 days. Excitation at 370 nm.

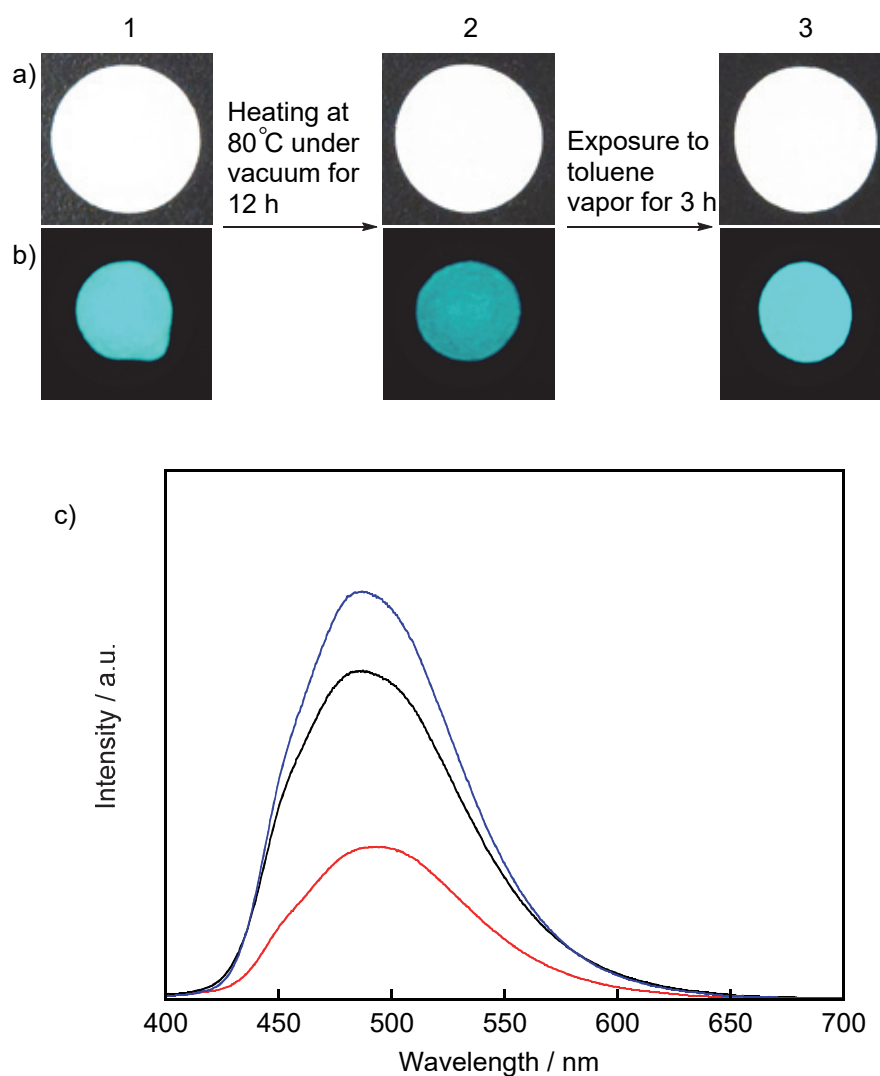

**Fig. S9** Photographs of a paper filter under a) daylight and b) a UV lamp (365 nm). The **2**-toluene-dropped paper (dropping of the chloroform solution **2** and drying; 10  $\mu$ L, [**2**] = 2.5 mM: exposure of toluene vapor for 1 h) was before (sample 1) and after heating at 80 °C under vacuum for 12 h (sample 2) and then after the exposure of toluene vapor for 3 h (sample 3) (paper filters' diameter: 21 mm). c) Emission spectra of the **2**-toluene-dropped paper before (black) and after heating at 80 °C under vacuum for 12 h (red) and then after the exposure of toluene vapor for 3 h (blue). Excitation at 370 nm.



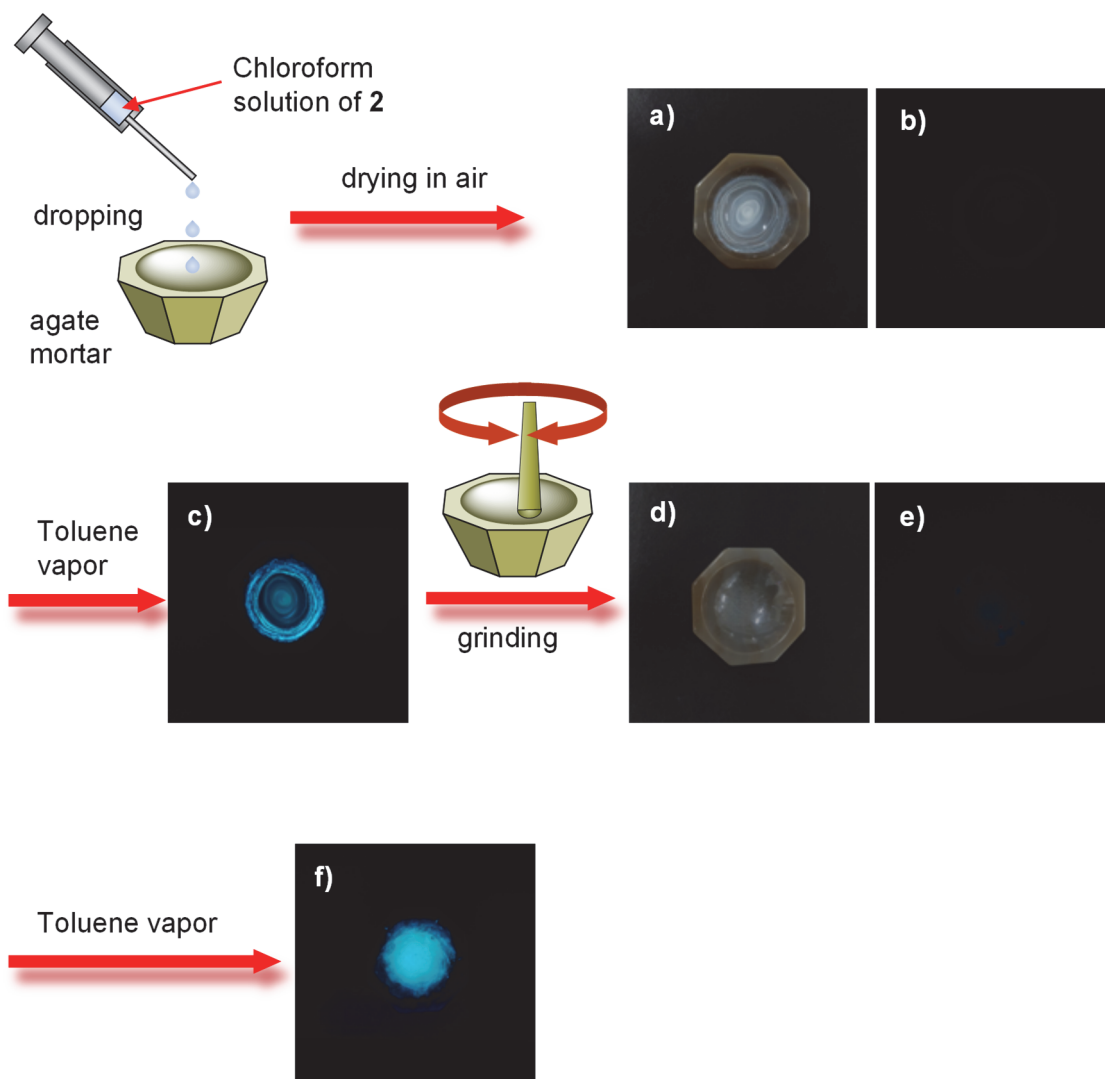

**Fig. S10** Photographs of **2** on the agate mortar under (a) and (c) daylight and (b), (c), (e), and (f) a UV lamp (365 nm). Compound **2** dried from chloroform solution on the agate mortar was exposed to toluene vapor for 1 h. The solid of **2** was grinded and exposed to toluene vapor for 1 h again.
